# Supplementary material for: The membrane associated accessory protein is an adeno-associated viral egress factor
Source: PubMed Central journal article supplement (PMC8556243; doi:10.1038/s41467-021-26485-4), 2021-10-29
Supplement: 41467_2021_26485_MOESM1_ESM.pdf [file 41467_2021_26485_MOESM1_ESM.pdf]

## Supplementary Information

### **The membrane associated accessory protein is an adeno-associated viral egress factor**

Zachary C. Elmore<sup>1</sup>, L. Patrick Havlik<sup>1</sup>, Daniel K. Oh<sup>1</sup>, Leif Anderson<sup>2</sup>, George Daaboul<sup>2</sup>, Garth W. Devlin<sup>1</sup>, Heather A. Vincent<sup>1</sup>, Aravind Asokan<sup>1,3,4,5\*</sup>

<sup>1</sup>Department of Surgery, <sup>2</sup>Nanoview Biosciences, Boston, Massachusetts, USA, <sup>3</sup>Department of Molecular Genetics & Microbiology, Duke University School of Medicine, Durham, NC, USA, <sup>4</sup>Department of Biomedical Engineering, <sup>5</sup>Duke Regeneration Center, Duke University, Durham, NC, USA,

\*Corresponding Author: Aravind Asokan, Ph.D.

5148, MSRB3,

3 Genome Court,

Durham NC 27710, USA

Email: [aravind.asokan@duke.edu](mailto:aravind.asokan@duke.edu)

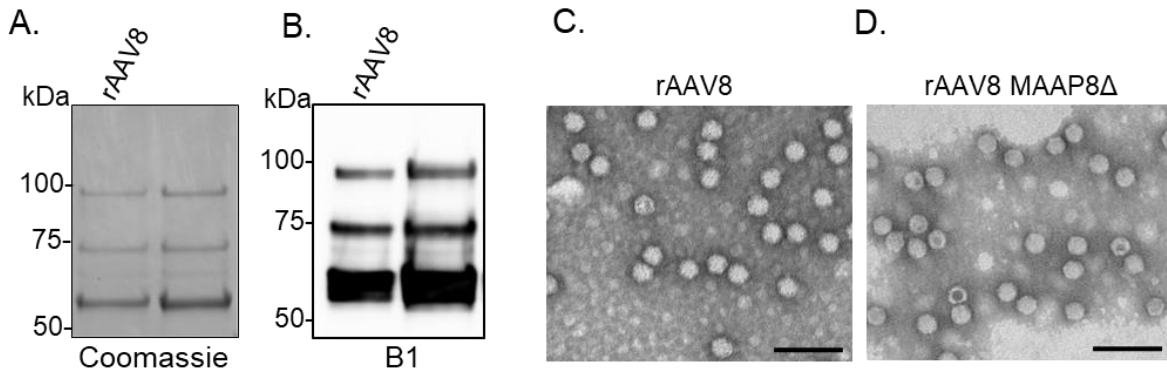

**Supplementary Figure 1. MAAP ablation does not affect AAV capsid protein composition and morphology.** (A) Recombinant AAV8 and AAV8 MAAP $\Delta$  virus was purified from the media of HEK293 producing cells. AAV8 and AAV8 MAAP $\Delta$  viral capsids were analyzed by SDS-PAGE under reducing conditions and stained with coomassie (A) or probed with a capsid (B1) specific antibody (B). Gel and immunoblot are representative images from 3 independent experiments. TEM images of rAAV8 (C) and rAAV8 MAAP $\Delta$  (D) viral capsids. TEM micrographs are representative images from 2 independent experiments. Scale bars, 100 nm.

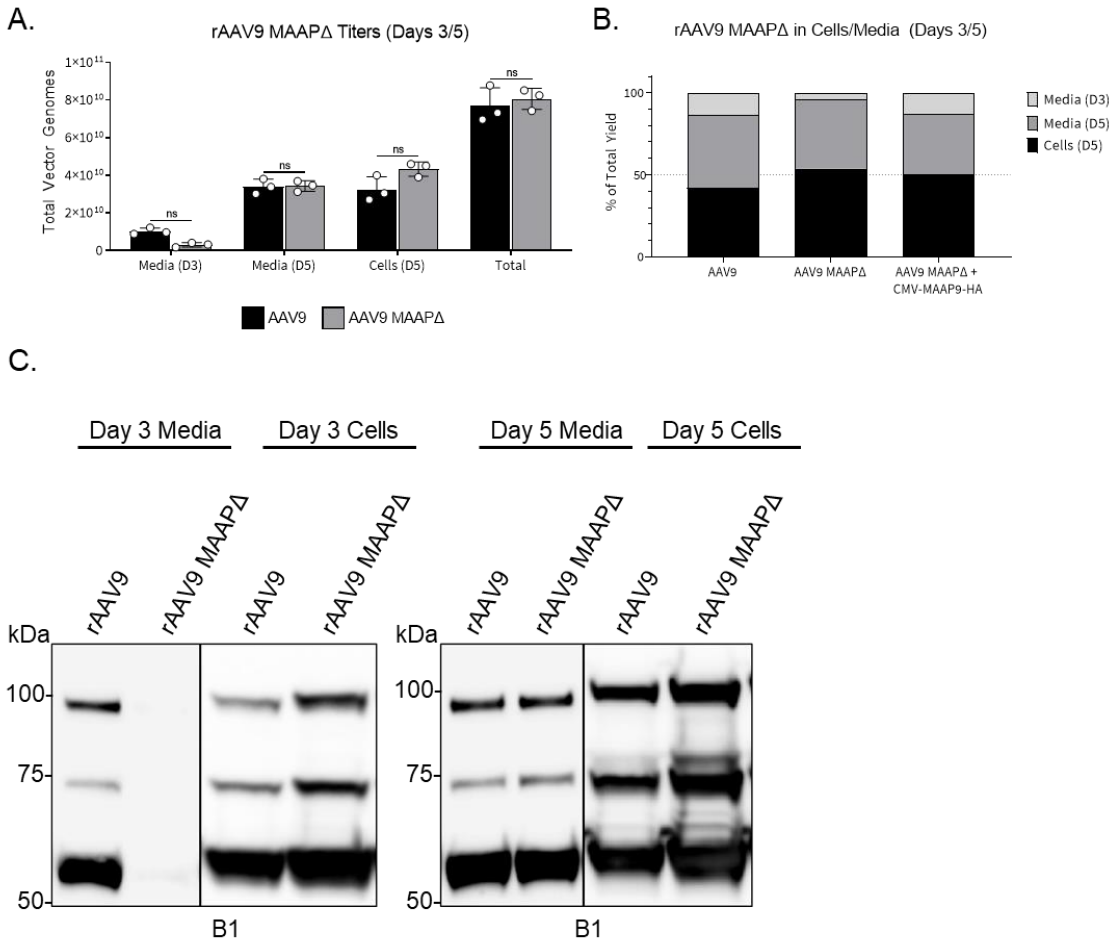

**Supplementary Figure 2. Ablation of MAAP expression differentially impacts recombinant**

**AAV9 secretion. (A)** AAV9 ssCBA-Luc vectors produced with WT Cap or MAAP $\Delta$  Cap. Total

vector genomes collected from the cells and media and the proportion of virus found in each media harvest or associated with the cells **(B)** are shown. Each bar is a representation of three experiments that are biological replicates. Data are presented as mean values +/- SD.

Significance was determined by two-way ANOVA, with Sidak's post-test.. <sup>n.s.</sup> $p \geq 0.05$ . **(C)**

Recombinant AAV9 and AAV9 MAAP $\Delta$  viruses were analyzed from the media and pellet of HEK293 producing cells at days 3 and 5 post transfection. Capsid proteins were analyzed by SDS-PAGE under reducing conditions and probed with a capsid (B1) specific antibody.

Immunoblots are representative images of 2 independent experiments.

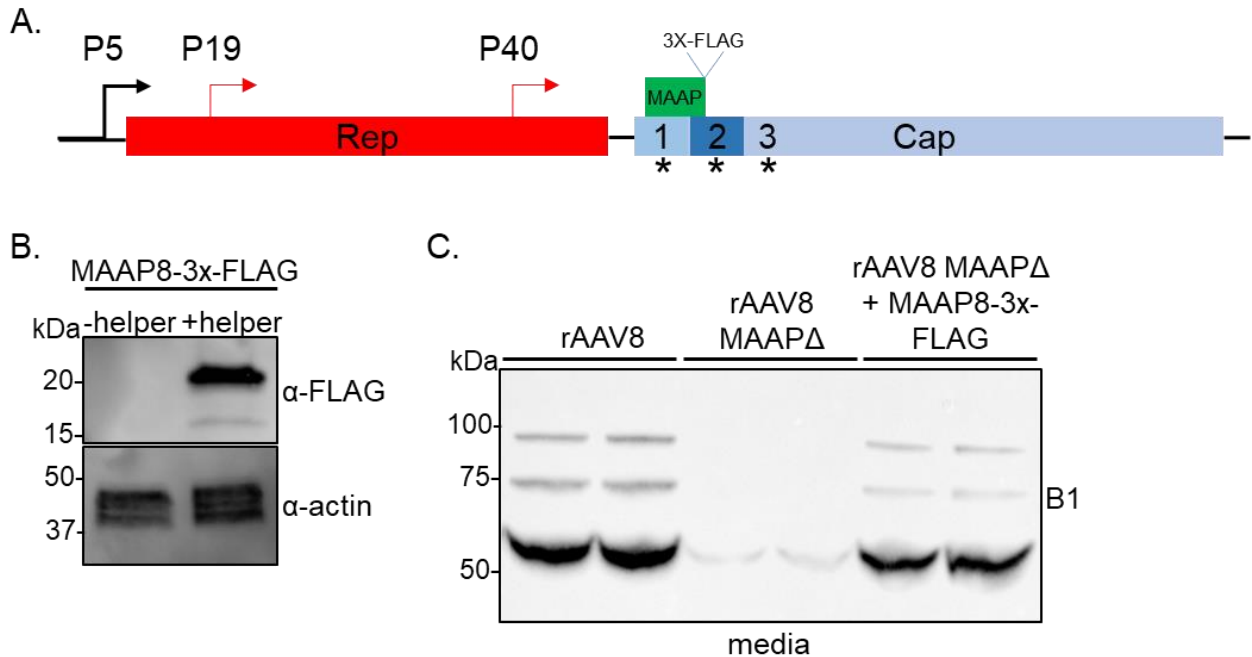

**Supplementary Figure 3. MAAP8-3X-FLAG rescues MAAP8 $\Delta$  function.**

(A) Schematic of recombinant AAV8 VP/AAP-null MAAP8-3X-FLAG (MAAP8-3X-FLAG)

plasmid used to replicate endogenous levels of MAAP expression. (B) HEK293 cells were transfected with MAAP8-3X-FLAG along with pXX680 (Adenoviral helper) plasmids and harvested 72 hours post transfection. Whole cell lysate was analyzed by SDS-PAGE under reducing conditions and probed with FLAG ( $\alpha$ -FLAG) and actin ( $\alpha$ -actin) specific antibodies. Immunoblot is a representative image of 2 independent experiments. (C) Recombinant AAV8 and AAV8 MAAP $\Delta$  viruses complemented with MAAP8-3X-FLAG were analyzed from the media of HEK293 producing cells at day 3 post transfection. Capsid proteins were analyzed by SDS-PAGE under reducing conditions and probed with a capsid (B1) specific antibody. Immunoblot is a representative image of 2 independent experiments.

media

media

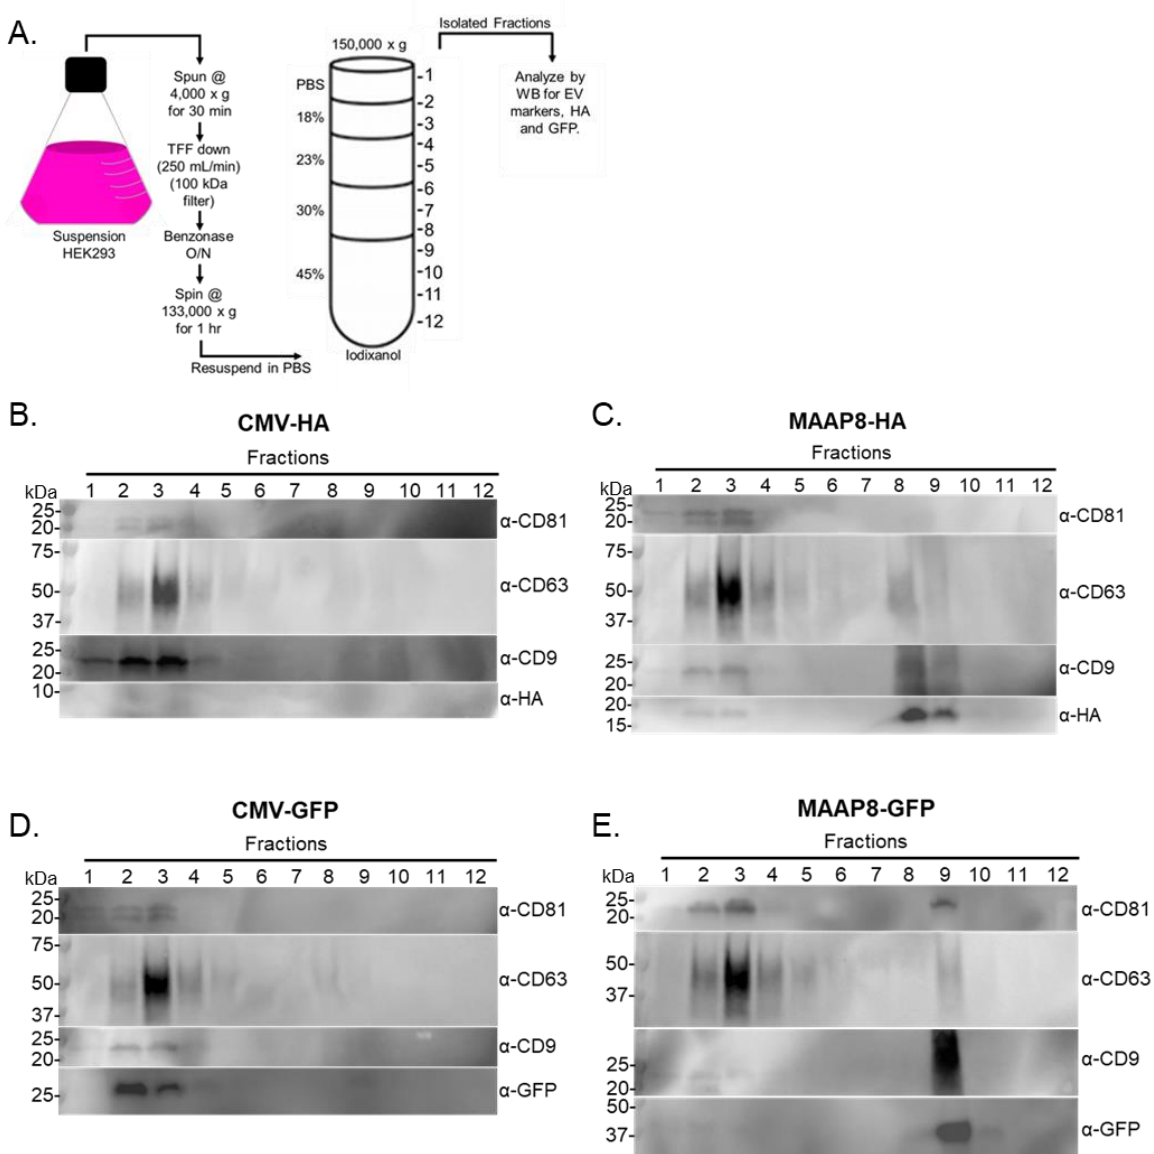

**Supplementary Figure 4. MAAP colocalizes with distinct EV fractions.**

(A) Schematic of EV isolation by iodixanol density gradient from HEK293 suspension culture. Immunoblots of iodixanol fractions from suspension cells expressing (B) CMV-HA, (C) CMV-MAAP8-HA, (D) CMV-GFP, (E) CMV-MAAP8-GFP. EVs and MAAP were analyzed from the media of HEK293 producing cells at day 3 post transfection. MAAP proteins (HA, GFP) were analyzed by SDS-PAGE under reducing conditions while EV markers (CD81, CD63, CD9) were analyzed by SDS-PAGE under non-reducing conditions (n=2).

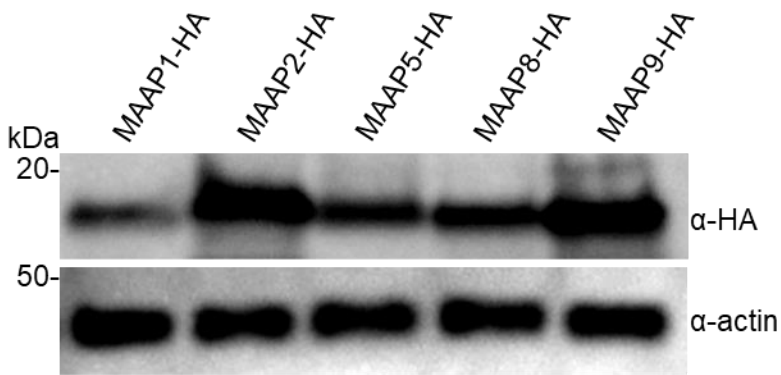

**Supplementary Figure 5. Expression of MAAP-HA fusions.** Anti-HA immunoblot of whole-cell extracts prepared from HEK293 cells expressing indicated HA tagged constructs. Anti-actin immunoblot served as loading control. Immunoblot is a representative image of 4 independent experiments.

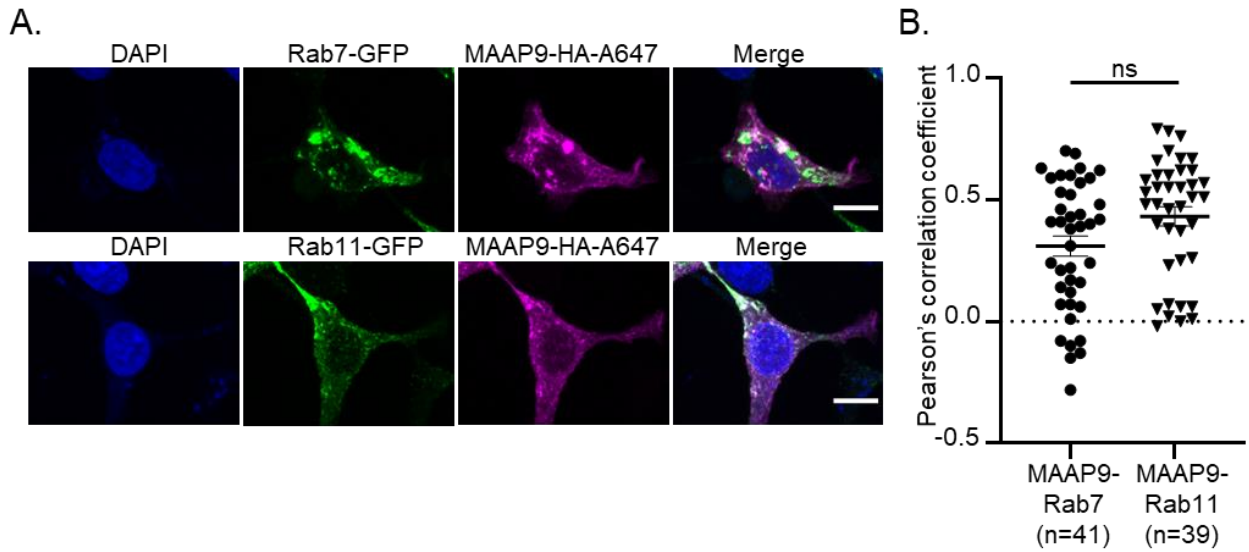

**Supplementary Figure 6. MAAP9 demonstrates similar colocalization with endocytic and**

**exocytic vesicular markers. (A)** HEK293 cells were transfected with expression vectors

encoding Rab7-GFP, Rab11-GFP, MAAP9-HA. MAAP-HA was detected by

immunofluorescence with an AlexaFlour647 secondary antibody (MAAP9-HA-A647). A Z-

stack of confocal optical sections at 1- $\mu$ m steps was acquired. A 3- $\mu$ m-thick medial stack is

shown. Images are representative of three experiments. Scale bars, 10  $\mu$ m. **(B)** Colocalization

between MAAP9-HA and Rab7-GFP or Rab11-GFP in the whole cell as assessed by Pearson's

correlation coefficient (R) as described in Materials and Methods. Each dot represents one cell.

Horizontal bars represent the mean  $\pm$  SEM, A two-sided Mann-Whitney rank test was used to

determine significance. <sup>ns</sup> $p \geq 0.05$

A.

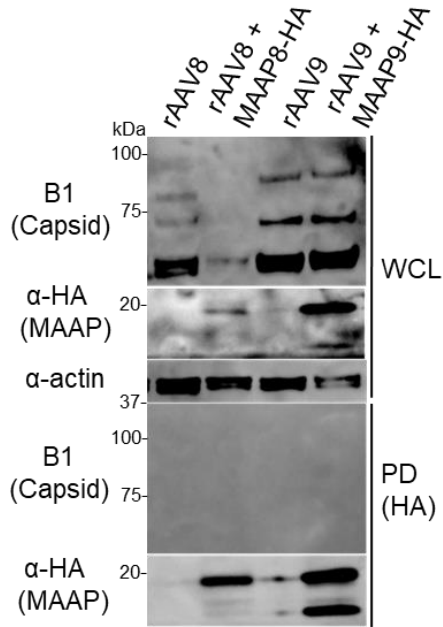

B.

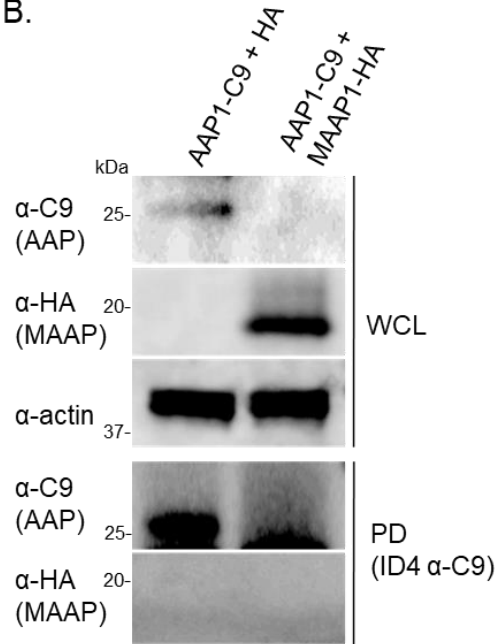

C.

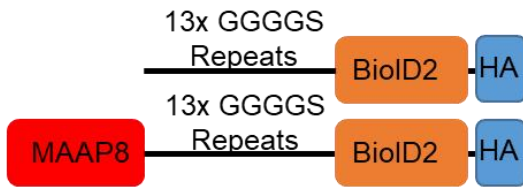

D.

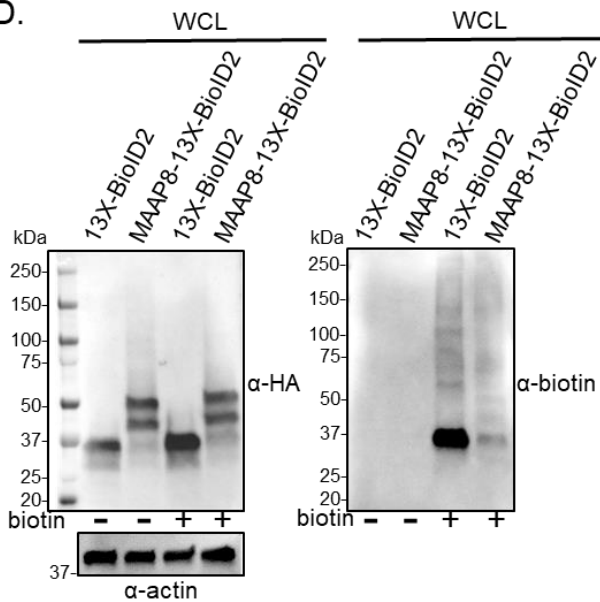

E.

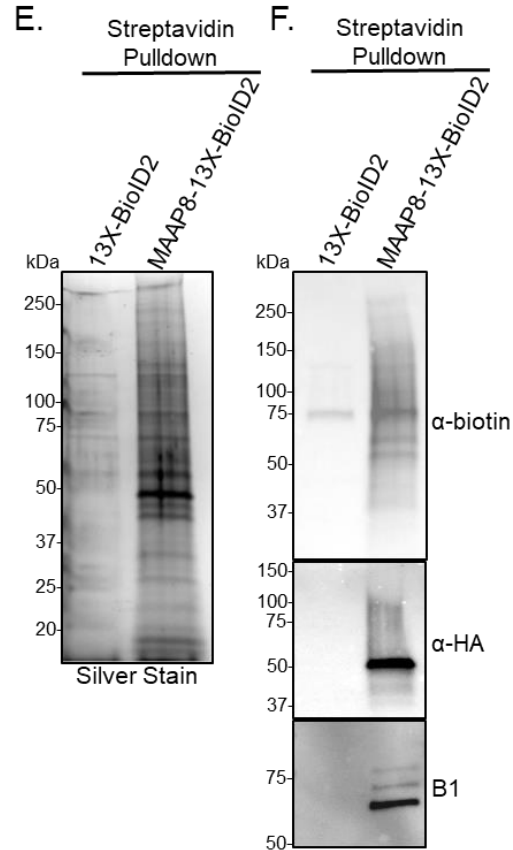

F.

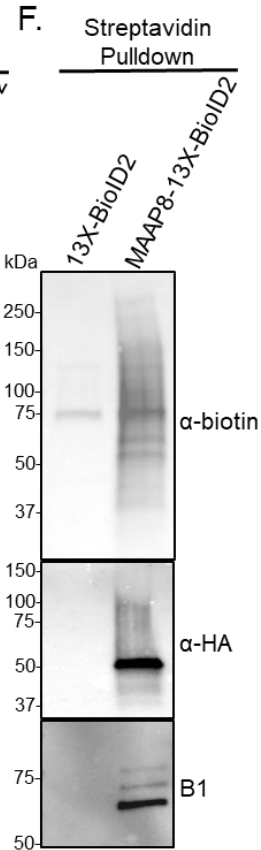



**Supplementary Figure 7. MAAP proximally interacts with the AAV capsid.**

(A) Immunoprecipitation (IP) of MAAP8/9-HA with rAAV8 and rAAV9 capsids and immunoblotting of input whole cell lysate (WCL) and pull down (PD) material for actin, capsid (B1), and MAAP8/9 (HA). (B) IP of AAP1-C9 and MAAP1-HA and immunoblotting of input whole cell lysate (WCL) and pull down (PD) material for actin, capsid (B1), MAAP8/9 (HA) and AAP (ID4). Immunoblots are representative of 3 independent experiments. (C) Schematic of MAAP8-13X-BioID2-HA fusions. (D) HEK293 cells were transfected with expression vectors encoding 13X-BioID2 and MAAP8-13X-BioID2. Media was supplemented with 50  $\mu$ M biotin 24 hours post transfection and cells were harvested 24 hours post biotin supplementation. Whole cell lysate (WCL) was analyzed by SDS-PAGE under reducing conditions and probed with HA ( $\alpha$ -HA), biotin ( $\alpha$ -biotin) and actin ( $\alpha$ -actin) specific antibodies. (E) HEK293 cells were transfected with plasmids encoding either 13X-BioID2 or MAAP8-13X-BioID2 along with pXX680, pTR-CBA-Luciferase, and AAV8-MAAP $\Delta$ . Media was supplemented with 50  $\mu$ M biotin 48 hours post transfection and cells were harvested 20 hours post biotin supplementation. Biotinylated proteins pulled down on streptavidin resin were separated by SDS-PAGE and visualized by silver stain or (F) probed with biotin ( $\alpha$ -biotin), ( $\alpha$ -HA), and capsid (B1) specific antibodies. Immunoblots are representative images of 3 independent experiments.

| <b>Supplementary Table 1</b> |                                                                  |
|------------------------------|------------------------------------------------------------------|
| <b>Sequencing Primer</b>     | <b>Sequence</b>                                                  |
| CMV-F (Eton)                 | CGCAAATGGGCGGTAGGCGTG                                            |
| BGH-R (Eton)                 | TAGAAGGCACAGTCGAGG                                               |
| PH116                        | CTGCCTGCGATCTGGTCAATGTGG                                         |
| 13xBiolID2-F                 | TCGGATCCCATCTTTTTTCGGA                                           |
|                              |                                                                  |
| <b>Primer</b>                | <b>Sequence</b>                                                  |
| pLH8-MAAP-3xFLAG SDM FWD     | CACGACATCGACTACAAGGACGACGACGACAAGTAGAGCCATCACCCCAGCGTTCTCCAGACTC |
| pLH8-MAAP-3xFLAG SDM REV     | GTCCTTGTAGTCACCGTCGTGGTCCTTGTAGTCCCGGTCTCTTCTTTCCAGGAGCCTCCTTAGC |
| AAV8-MAAPnull-SDM-F          | AGGAGCCCCGAAGCCCAAAGC                                            |
| AAV8-MAAPnull-SDM-R          | GGTTTCAGCGCCCACCACTCG                                            |
| MAAP2 null F                 | GAACAATAAATGATTTAAATCAGGTATGGCTG                                 |
| MAAP2 null R                 | CTTAACAGGTTCTCAACCAG                                             |
| MAAP5 null F                 | GAACAATAAATGATTTAAATCAGGTATGGCTTTTGTGATCAC                       |
| MAAP5 null R                 | CCTGAAAGACTGCCTTTCCG                                             |
| MAAP8 delta 1-Fwd            | CAAAAGCAGGACGACGGCTACAAGTACCTCGG                                 |
| MAAP8 delta 1-Rev            | CCGAGGTA CTTGTAGCCGTCGTCCTGCTTTTG                                |
| MAAP8 delta 2-Fwd            | CGTCCGCCGAGCCAGGAAGCACCCAGA                                      |
| MAAP8 delta 2-Rev            | TCTGGTGCTTCCTGGCTCGGCGGACG                                       |
| MAAP8 delta 3-Fwd            | CGCAGCGGCCAGGGCGGGTGAC                                           |
| MAAP8 delta 3-Rev            | GTCACCCGCCTGGGCCGCTGCG                                           |
| MAAP8 delta 4-Fwd            | GTATCTTCTTGCAGACCACCCGCCTGCAGCTG                                 |
| MAAP8 delta 4-Rev            | CAGCTGCAGGCGGGTGGTCTGCAAGAAGATAC                                 |
| MAAP8 delta 5-Fwd            | GCTTCTTGGCCTTGCCCCAAAAGACGTATCTTC                                |
| MAAP8 delta 5-Rev            | GAAGATACGTCTTTTGGGGGCAAGGCCAAGAAGC                               |
| MAAP8 delta 6-Fwd            | GGCCAAGAAGCGGGAGGAAGGCGCTAAG                                     |
| MAAP8 delta 6-Rev            | CTTAGCGCCTTCCTCCCGCTTCTTGGCC                                     |

|                                |                                                                                                                                                                                                                                                                                                                                   |
|--------------------------------|-----------------------------------------------------------------------------------------------------------------------------------------------------------------------------------------------------------------------------------------------------------------------------------------------------------------------------------|
| MAAP8 delta 1-4-Fwd            | GCAAAGCAGGACGACGGTCTGCAAGAAGATACG                                                                                                                                                                                                                                                                                                 |
| MAAP8 delta 1-4-Rev            | CGTATCTTCTTGCAGACCGTCGTCCTGCTTTTGC                                                                                                                                                                                                                                                                                                |
| MAAP8 delta 1-3-Fwd            | GGATTGTCACCCGCCTCGTCGTCCTGCTTTTG                                                                                                                                                                                                                                                                                                  |
| MAAP8 delta 1-3-Rev            | CAAAAGCAGGACGACGAGGCGGGTGACAATCC                                                                                                                                                                                                                                                                                                  |
| MAAP8 delta 1-2-Fwd            | AGCAGGACGACGCGGCGGACGCAG                                                                                                                                                                                                                                                                                                          |
| MAAP8 delta 1-2-Rev            | CTGCGTCCGCCGCGTCGTCCTGCT                                                                                                                                                                                                                                                                                                          |
| MAAP8-deltaC-(delta74-119)-REV | TGGTCCTTGTAGTCACTCGGCGTCGGCG                                                                                                                                                                                                                                                                                                      |
| MAAP8-deltaC-(delta74-119)-FWD | CGCCGACGCCGAGTGACTACAAGGACCA                                                                                                                                                                                                                                                                                                      |
| MAAP8-deltaL-(delta24-73)-REV  | GCAGACGCTCCTGAAAGCCAGGAAGCACCA                                                                                                                                                                                                                                                                                                    |
| MAAP8-deltaL-(delta24-73)-FWD  | TGGTGCTTCTGGCTTTCAGGAGCGTCTGC                                                                                                                                                                                                                                                                                                     |
| MAAP8-deltaN-(delta2-24)-REV   | GGGCGCTGAAACCTGACAAGTACCTCGGAC                                                                                                                                                                                                                                                                                                    |
| MAAP8-deltaN-(delta2-24)-FWD   | GTCCGAGGTA CT TGT CAGGTTTCAGCGCCC                                                                                                                                                                                                                                                                                                 |
| MAAP8-deltaNL-(delta2-73)-REV  | GGGCGCTGAAACCTGTTCAGGAGCGTCTGC                                                                                                                                                                                                                                                                                                    |
| MAAP8-deltaNL-(delta2-73)-FWD  | GCAGACGCTCCTGAACAGGTTTCAGCGCCC                                                                                                                                                                                                                                                                                                    |
| mAAP8 W47S QC F                | TCGAGCACGACAAGGCCTACGACCAGCAGCTGCAGGCG                                                                                                                                                                                                                                                                                            |
| mAAP8 W47S QC R                | GTAGGCCTTGTGCTGCTCGAGGGCCGCTGCGTCC                                                                                                                                                                                                                                                                                                |
| 13x BioID ATG Fix QC F         | CGCCTCCACCGGATCCCATGAATTCCGAAAAAAGAT                                                                                                                                                                                                                                                                                              |
| 13x BioID ATG Fix QC R         | ATCTTTTTTCGGAATTCATGGGATCCGGTGGAGGCG                                                                                                                                                                                                                                                                                              |
| 13x mAAP8 BioID F              | CTAGCTAGCATGGAGCCCCGAAGC                                                                                                                                                                                                                                                                                                          |
| 13x mAAP8 BioID R              | CCGGATTACCGGTACCGGTCTCTTCTTTC                                                                                                                                                                                                                                                                                                     |
|                                |                                                                                                                                                                                                                                                                                                                                   |
| <b>gblock</b>                  | <b>Sequence</b>                                                                                                                                                                                                                                                                                                                   |
| mAAP2-null                     | GAACAATAAATGATTTAAATCAGGTATGGCTGCCGATGGTTATCTTCCAGAT<br>TGGCTCGAGGACACTCTCTCTGAAGGAATAAGACAGTGGTGGAAGCTCAAA<br>CCAGGCCACCACCACCAAGCCCGCAGAGCGGCATAAGGACGACAGCA<br>GGGGTCTTGTGCTTCCAGGGTACAAGTACCTCGGACCCTTCAACGGACTC<br>GACAAGGGAGAGCCGGTCAACGAGGCAGACGCCGCGGCCCTCGAGCACG<br>ACAAAGCCTACGACCAGGCGAGCTCGACAGCGGAGACAACCCGTACCTGAAG |

|            |                                                                                                                                                                                                                                                                                                                                                                                                                                                                                                                                                                                                                                                                                                                                                                                                                                                                                                                                                                                                                                                                                                                                                                                                                                                                                                                                                                                                                                                                                                                                                                                                                                     |
|------------|-------------------------------------------------------------------------------------------------------------------------------------------------------------------------------------------------------------------------------------------------------------------------------------------------------------------------------------------------------------------------------------------------------------------------------------------------------------------------------------------------------------------------------------------------------------------------------------------------------------------------------------------------------------------------------------------------------------------------------------------------------------------------------------------------------------------------------------------------------------------------------------------------------------------------------------------------------------------------------------------------------------------------------------------------------------------------------------------------------------------------------------------------------------------------------------------------------------------------------------------------------------------------------------------------------------------------------------------------------------------------------------------------------------------------------------------------------------------------------------------------------------------------------------------------------------------------------------------------------------------------------------|
|            | TACAACCACGCCGACGCGGAGTTTCAGGAGCGCCTTAAAGAAGATACGTC<br>TTTTGGGGGCAACCTCGGACGAGCAGTCTTCCAGGCGAAAAAGAGGGTTC<br>TTGAACCTCTGGGCCTGGTTGAGGAACCTGTTAAG                                                                                                                                                                                                                                                                                                                                                                                                                                                                                                                                                                                                                                                                                                                                                                                                                                                                                                                                                                                                                                                                                                                                                                                                                                                                                                                                                                                                                                                                                     |
| mAAP9-null | ATATAAGTGAGCCCAAACGGGTGCGCGAGTCAGTTGCGCAGCCATCGACG<br>TCAGACGCGGAAGCTTCGATCAACTACGCAGACAGGTACCAAAACAAATGT<br>TCTCGTCACGTGGGCATGAATCTGATGCTGTTTCCCTGCAGACAATGCGAG<br>AGAATGAATCAGAATTCAAATATCTGCTTCACTCACGGACAGAAAGACTGTT<br>TAGAGTGCTTTCCCGTGTGAGAATCTCAACCCGTTTCTGTCGTCAAAAAGG<br>CGTATCAGAAACTGTGCTACATTCATCATATCATGGGAAAGGTGCCAGACG<br>CTTGCACTGCCTGCGATCTGGTCAATGTGGATTTGGATGACTGCATCTTTG<br>AACAAATAATGATTTAAATCAGGTATGGCTGCCGATGGTTATCTTCCAGATT<br>GGCTCGAGGACAACCTTAGTGAAGGAATTCGCGAGTGGTGGGCTTTGAAA<br>CCAGGAGCCCCTCAACCCAAGGCAAATCAACAACATCAAGACAACGCTCG<br>AGGTCTTGTGCTTCCGGGTTACAAATACCTTGGACCCGGCAACGGACTCGA<br>CAAGGGGGGAGCCGGTGAACGCAGCAGACGCGGGCCGCTCGAGCACGAC<br>AAGGCCTACGACCAGCAGCTGAAGGCCGGAGACAACCCGTACCTCAAGTA<br>CAACCACGCCGACGCCGAGTTCCAGGAGCGGCTGAAAGAAGATACGTCTT<br>TTGGGGGCAACCTCGGGCGAGCAGTCTTCCAGGCCAAAAAGAGGCTTCTA<br>GAACCTCTTGGTCTGGTTGAGGAAGCGGCTAAGACGGCTCCTGGAAAGAA<br>GAGGCCTGTAGAGCAGTCTCCTCAGGAACCGGACTCCTCCGCGGGTATTG<br>GCAAATCGGGTGCACAGCCCGCTAAAAAGAGACTCAATTTCCGGTCAGACTG<br>GCGACACAGAGTCAGTCCCAGACCCTCAACCAATCGGAGAACCTCCCAGCA<br>GCCCCCTCAGGTGTGGGATCTCTTACAATGGCTTCCAGGTGGTGGCGCACC<br>AGTGGCAGACAATAACGAAGGTGCCGATGGAGTGGGTAGTTCCTCGGGAA<br>ATTGGCATTGCGATTCCCAATGGCTGGGGGACAGAGTCATCACCACCAGC<br>ACCCGAACCTGGGCCCTGCCACCTACAACAATCACCTCTACAAGCAAATC<br>TCCAACAGCACATCTGGAGGATCTTCAAATGACAACGCCTACTTCCGGCTAC<br>AGCACCCCTGGGGGTATTTTGACTTCAACAGATTCCACTGCCACTTCTCA<br>CCACGTGACTGGCAGCGACTCATCAACAACAACCTGGGGATTCCGGCCTAA<br>GCGACTCAACTTCAAGCTCTTCAACATTCAGGTCAAAGAGGTTACGGACAA<br>CAATGGAGTCAAGACCATCGCCAATAACCTTACCAGCACGGTCCAGGTCTT<br>CACGGACTCAGACTATCAGCTCCCGTACGTGCTCGGGTCCG |
| mAAP8-null | GATGGTTATCTTCCAGATTGGCTCGAGGACAACCTCTCTGAGGGCATTCCG<br>GAGTGGTGGGCGCTGAAACCAGGAGCCCCGAAGCCCAAAGCCAACCAGC<br>AAAAGCAGGACGACGGCCGGGTCTGGTGTCTTCCAGGCTACAAGTACCTC<br>GGACCCTTCAACGGACTCGACAAGGGGGAGCCCGTGAACGCGGCGGACG<br>CAGCGGCCCTCGAGCACGACAAGGCCTACGACCAGCAGCTGCAGGCGGG<br>TGACAATCCGTACCTGAGGTATAACCACGCCGACGCCGAGTTTCCAGGAGC<br>GTCTGCAAGAAGATACGTCTTTTGGGGGCAACCTAGGGCGAGCAGTCTTC<br>CAGGCCAAGAAGCGGGTTCTCGAACCTCTCGGTCTGGTTGAGGAAGGCGC<br>TAAGACGGCTCCTGAAAGAAGAGACCGGTAGAGCCATC                                                                                                                                                                                                                                                                                                                                                                                                                                                                                                                                                                                                                                                                                                                                                                                                                                                                                                                                                                                                                                                                                                                                               |
| mAAP5-null | GAACAATAAATGATTTAAATCAGGTATGGCTTTTGTGATCACCTCCAGAT<br>TGGTTGGAAGAAGTTGGTGAAGGTCTTCGCGAGTTTTTGGGCCTTGAAGCG<br>GGCCCACCGAAACCAAAACCCAATCAGCAGCATCAAGATCAAGCCCGTGG<br>TCTTGTGCTGCCAGGTTATAACTATCTCGGACCCGGAAACGGTCTCGATCG<br>AGGAGAGCCTGTCAACAGGGCAGACGAGGTGCGCGGAGAGCACGACATC<br>TCGTACAACGAGCAGCTTGAGGCGGGAGACAACCCCTACCTGAAGTACAA<br>CCACGCGGACGCCGAGTTTCCAGGAGAAGCTCGCCGACGACACATCCTTCG<br>GGGAAACCTCGGAAAGGCAGTCTTTCAGG                                                                                                                                                                                                                                                                                                                                                                                                                                                                                                                                                                                                                                                                                                                                                                                                                                                                                                                                                                                                                                                                                                                                                                                                           |

|            |                                                                                                                                                                                                                                                                                                                                                                                                                                                                                                                                                                                                                                                                                                                                                                                                                                                                                                                                                                                                                                                                                                                                                                                                                                                                                                                                                                                                                                                                                                                                                                                                                                                                                                                                              |
|------------|----------------------------------------------------------------------------------------------------------------------------------------------------------------------------------------------------------------------------------------------------------------------------------------------------------------------------------------------------------------------------------------------------------------------------------------------------------------------------------------------------------------------------------------------------------------------------------------------------------------------------------------------------------------------------------------------------------------------------------------------------------------------------------------------------------------------------------------------------------------------------------------------------------------------------------------------------------------------------------------------------------------------------------------------------------------------------------------------------------------------------------------------------------------------------------------------------------------------------------------------------------------------------------------------------------------------------------------------------------------------------------------------------------------------------------------------------------------------------------------------------------------------------------------------------------------------------------------------------------------------------------------------------------------------------------------------------------------------------------------------|
| mAAP1-null | <p>GCTCGAGGACAACCTCTCTGAGGGCATTGCGAGTGGTGGGACTTGAAAC<br/> CAGGAGCCCCGAAGCCCAAAGCCAACCAGCAAAAGCAGGACGACGGCCG<br/> GGGTCTGGTGCTTCCAGGCTACAAGTACCTCGGACCCTTCAACGGACTAG<br/> ACAAGGGGGAGCCCGTCAACGCGGCGGACGCAGCGGCCCTCGAGCACGA<br/> CAAGGCCTACGACCAGCAGCTCAAAGCGGGTGACAATCCGTACCTGAGGT<br/> ATAACCACGCCGACGCCGAGTTTCAGGAGCGTCTGCAAGAAGATACGTCTT<br/> TTGGGGGCAACCTCGGGCGAGCAGTCTTCCAGGCCAAGAAGCGGGTTCTC<br/> GAACCTCTCGGTCTGGTTGAGGAAGGCGCTAAGACGGCTCCTGGAAAGAA<br/> ACGTCCGGTAGAGCAGTCGCCACAAGAGCCAGACTCCTCCTCGGGCATCG<br/> GCAAGACAGGCCAGCAGCCCGCTAAAAAGAGACTCAATTTTGGTCAGACT<br/> GGCGACTCAGAGTCAGTCCCCGATCCACAACCTCTCGGAGAACCTCCAGC<br/> AACCCCGCTGCTGTGGGACCTACTACAATGGCTTCAGGCGGTGGCGCAC<br/> CAATGGCAGACAATAACGAAGGCGCCGACGGAGTGGGTAATGCCTCAGGA<br/> AATTGGCATTGCGATTCCACATGGCTGGGCGACAGAGTCATCACCACCAG<br/> CACCCGCACCTGGGCCTTGCCACCTACAATAACCACCTCTACAAGCAAAT<br/> CTCCAGTGCTTCAACGGGGGCCAGCAACGACAACCACTACTTCGGCTACA<br/> GCACCCCTGGGGGTATTTTGATTTCAACAGATTCCACTGCCACTTTTCAC<br/> CACGTGACTGGCAGCGACTCATCAACAACAATTGGGGATTCCG</p>                                                                                                                                                                                                                                                                                                                                                                                                                                                                                                                                                                                                                                                                                                      |
| AAV8 VP*   | <p>ATCAAAAGGGTGGAGCCAAGAAAAGACCCGCCCCAGTGACGCAGATATA<br/> AGTGAGCCCAAACGGGTGCGCGAGTCAGTTGCGCAGCCATCGACGTCAGA<br/> CGCGGAAGCTTCGATCAACTACGCAGACAGGTACCAAACAATGTTCTCG<br/> TCACGTGGGCATGAATCTGATGCTGTTTCCCTGCAGACAATGCGAGAGAAT<br/> GAATCAGAATTCAAATATCTGCTTCACTCACGGACAGAAAGACTGTTTAGAG<br/> TGCTTTCCCGTGTCAGAATCTCAACCCGTTTTCTGTCGTCAAAAAGGCGTAT<br/> CAGAAACTGTGCTACATTCATCATATCATGGGAAAGGTGCCAGACGCTTGC<br/> ACTGCCTGCGATCTGGTCAATGTGGATTTGGATGACTGCATCTTTGAACAA<br/> TAAATGATTTAAATCAGGTATAGCTGCCGATGGTTATCTTCCAGATTGGCTC<br/> GAGGACAACCTCTCTGAGGGCATTGCGAGTGGTGGGCGCTGAAACCTGG<br/> AGCCCCGAAGCCCAAAGCCAACCAGCAAAAGCAGGACGACGGCCGGGGT<br/> CTGGTGCTTCCCTGGCTACAAGTACCTCGGACCCTTCAACGGACTCGACAAG<br/> GGGGAGCCCGTCAACGCGGCGGACGCAGCGGCCCTCGAGCACGACAAG<br/> GCCTACGACCAGCAGCTGCAGGCGGGTGACAATCCGTACCTGCGGTATAA<br/> CCACGCCGACGCCGAGTTTCAGGAGCGTCTGCAAGAAGATACGTCTTTTG<br/> GGGGCAACCTCGGGCGAGCAGTCTTCCAGGCCAAGAAGCGGGTTCTCGA<br/> ACCTCTCGGTCTGGTTGAGGAAGGCGCTAAGGAGGCTCCTGGAAAGAAGA<br/> GACCGGTAGAGCCATCACCCAGCGTTCTCCAGACTCCTCTACGGGCATC<br/> GGCAAGAAAGGCCAACAGCCCGCCAGAAAAAGACTCAATTTTGGTCAGAC<br/> AGGCGACTCAGAGTCAGTTCAGACCCTCAACCTCTCGGAGAACCTCCAG<br/> CAGCGCCCTCTGGTGTGGGACCTAATACAATAGCTGCAGGCGGTGGCGCA<br/> CCAATAGCAGACAATAACGAAGGCGCCGACGGAGTGGGTAGTTCCTCGGG<br/> AAATTGGCATTGCGATTCCACATAGCTGGGCGACAGAGTCATCACCACCAG<br/> CACCCGAACCTGGGCCCTGCCACCTACAACAACCACCTCTACAAGCAAAT<br/> CTCCAACGGGACATCGGGAGGAGCCACCAACGACAACACCTACTTCGGCT<br/> ACAGCACCCCTGGGGGTATTTTGACTTTAACAGATTCCACTGCCACTTTTC<br/> ACCACGTGACTGGCAGCGACTCATCAACAACAACCTGGGGATTCCGGCCCA<br/> AGAGACTCAGCTTCAAGCTCTTCAACATCCAGGTCAAGGAGGTCACGCAGA<br/> ATGAAGGCACCATGACCATAGCCAATAACCTGACCAGCACCATCCAGGTGT<br/> TTACGGACTCGGAGTACCAGCTGCCGTACGTTCTCGAT</p> |

**Supplementary Table 1. List of primers and DNA sequences used in this study.**
